# Supplementary material for: MOG-induced experimental autoimmune encephalomyelitis in the rat species triggers anti-neurofascin antibody response that is genetically regulated
Source: Springer Nature journal article supplement (doi:10.1186/s12974-015-0417-2), 2015-10-29

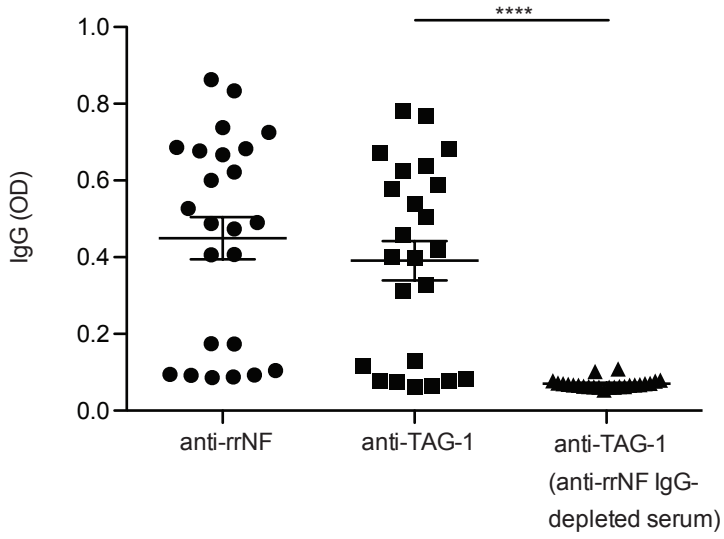

Supplement: MOESM5 [file 9768890]
